# Supplementary material for: The Irie Classroom Toolbox, a universal violence-prevention teacher-training programme, in Jamaican preschools: a single-blind, cluster-randomised controlled trial
Source: PubMed Central journal article supplement — Lancet Glob Health. 2021 Feb 22;9(4):e456–68. doi: 10.1016/S2214-109X(21)00002-4 (PMC7966677; doi:10.1016/s2214-109x(21)00002-4), 2021-02-22
Supplement: mmc1.pdf [file mmc1.pdf]

# THE LANCET

## Global Health

### Supplementary appendix

This appendix formed part of the original submission and has been peer reviewed. We post it as supplied by the authors.

Supplement to: Baker-Henningham H, Bowers M, Francis T, Vera-Hernández M, Walker SP. The Irie Classroom Toolbox, a universal violence-prevention teacher-training programme, in Jamaican preschools: a single-blind, cluster-randomised controlled trial. *Lancet Glob Health* 2021; published online Feb 22. [http://dx.doi.org/10.1016/S2214-109X\(21\)00002-4](http://dx.doi.org/10.1016/S2214-109X(21)00002-4).

**Webtable 1** Internal reliability and test-retest of teacher well-being, child inhibitory control, and child mental health measures

|                                                                                        | Internal Reliability<br>(Cronbach's alpha) | Test Retest <sup>1</sup> |
|----------------------------------------------------------------------------------------|--------------------------------------------|--------------------------|
| <b>Teacher Well-Being</b>                                                              |                                            |                          |
| Depressive Symptoms                                                                    | 0.88                                       | 0.82                     |
| Teacher burn-out                                                                       | 0.88                                       | 0.81                     |
| Teaching self-efficacy                                                                 | 0.87                                       | 0.75                     |
| <b>Child Inhibitory Control: test-retest (ICC)=0.82 (for composite of three tests)</b> |                                            |                          |
| Big/little Stroop                                                                      | ..                                         | 0.64                     |
| Silly Sounds Stroop                                                                    | ..                                         | 0.41                     |
| Frog/Bear                                                                              | ..                                         | 0.58                     |
| <b>Child Mental Health</b>                                                             |                                            |                          |
| Behaviour Difficulties                                                                 | 0.83                                       | 0.80                     |
| Prosocial Skills                                                                       | 0.82                                       | 0.78                     |
| Clinical range for Behaviour Difficulties                                              | ..                                         | 0.85                     |
| Impact of Difficulties on Daily Life                                                   | ..                                         | 0.83                     |

<sup>1</sup>Test re-test conducted over 2 weeks with non-study children, prior to baseline data collection, n=20 for all values; values are intraclass correlation coefficients (ICC).

**Webtable 2** Distribution of the observational data of counts of violence against children by teachers at baseline, post-intervention, and one-year follow-up

| Counts of violence against children by teachers | n (%) at baseline | n (%) at post-intervention | n (%) at one-year follow-up |
|-------------------------------------------------|-------------------|----------------------------|-----------------------------|
| 0                                               | 37 (16)           | 39 (20)                    | 45 (24)                     |
| 1                                               | 15 (7)            | 13 (7)                     | 22 (12)                     |
| 2                                               | 15 (7)            | 17 (9)                     | 10 (5)                      |
| 3                                               | 12 (5)            | 15 (8)                     | 8 (4)                       |
| 4                                               | 12 (5)            | 4 (2)                      | 15 (8)                      |
| 5                                               | 7 (3)             | 6 (3)                      | 8 (4)                       |
| 6-10                                            | 43 (19)           | 22 (11)                    | 27 (14)                     |
| 11-15                                           | 28 (12)           | 21 (11)                    | 19 (10)                     |
| 16-20                                           | 13 (6)            | 12 (6)                     | 12 (7)                      |
| 21-25                                           | 12 (5)            | 8 (4)                      | 5 (3)                       |
| 26-30                                           | 9 (4)             | 8 (4)                      | 7 (4)                       |
| 31-50                                           | 12 (5)            | 17 (9)                     | 9 (5)                       |
| >50                                             | 14 (6)            | 18 (9)                     | 2 (1)                       |

**Webtable 3** Factor analyses of teacher well-being questionnaires and child inhibitory control tests at baseline, post-intervention, and one-year follow-up

|                                     | Baseline | Post-intervention | Follow-up |
|-------------------------------------|----------|-------------------|-----------|
| <b>Teacher well-being</b>           |          |                   |           |
| Depressive symptoms (reverse coded) | 0.73     | 0.78              | 0.81      |
| Burn out (reverse coded)            | 0.82     | 0.85              | 0.82      |
| Teaching self-efficacy              | 0.71     | 0.63              | 0.68      |
| <i>Variance explained</i>           | 57%      | 58%               | 60%       |
| <b>Child inhibitory control</b>     |          |                   |           |
| Big/little test score               | 0.76     | 0.74              | ..        |
| Silly sounds test score             | 0.74     | 0.74              | ..        |
| Bear/frog score (reverse coded)     | 0.58     | 0.66              | ..        |
| <i>Variance explained</i>           | 59%      | 51%               | ..        |

**Webtable 4** below shows the variables that have been imputed, the non-imputed variables used in the imputation and the model used to obtain the multiple imputations. The non-imputed variables include group assignment, covariates (see table notes), and the value of the outcome variable at baseline when such does not have missing values (cases: 1,3,8,9,10,11,12). In some cases (2, 4, 5, 6, 7, 13), the outcome variable at baseline is missing for one teacher or child, in such case we also use the baseline value of another outcome variable for the imputation, and we impute the both the baseline and post-intervention or follow-up value jointly using chained equations. The sensitivity analysis replicates the main analysis but we also use interactions between the covariates and group assignment in the imputation model.

| Case                                          | Outcomes                                             | Imputed variables                                       | Non-imputed variables used in the imputation                                                   | Model used        |
|-----------------------------------------------|------------------------------------------------------|---------------------------------------------------------|------------------------------------------------------------------------------------------------|-------------------|
| <b>Teacher/classroom outcomes - primary</b>   |                                                      |                                                         |                                                                                                |                   |
| (1)                                           | Violence against children (VAC) by teachers (counts) | Post-intervention (29) and Follow-up (43)               | Baseline level of teachers' use of VAC (counts), group assignment, covariates                  | Negative Binomial |
| (2)                                           | Class-wide aggression                                | Baseline (1), Post-intervention (29) and Follow-up (43) | Baseline level of teachers' use of VAC (counts), group assignment, covariates                  | Linear Regression |
| <b>Teacher/classroom outcomes - secondary</b> |                                                      |                                                         |                                                                                                |                   |
| (3)                                           | VAC by teachers (binary)                             | Post-intervention (29) and Follow-up (43)               | Baseline level of teachers' use of VAC (binary), group assignment, covariates                  | Logit             |
| (4)                                           | Class-wide prosocial behaviour                       | Baseline (1), Post-intervention (29) and Follow-up (43) | Baseline level of teachers' use of VAC (counts), group assignment, covariates                  | Linear Regression |
| (5)                                           | Emotional support                                    | Baseline (1), Post-intervention (29) and Follow-up (43) | Baseline level of teachers' use of VAC (counts), group assignment, covariates                  | Linear Regression |
| (6)                                           | Classroom organisation                               | Baseline (1), Post-intervention (29) and Follow-up (43) | Baseline level of teachers' use of VAC (counts), group assignment, covariates                  | Linear Regression |
| (7)                                           | Instructional support                                | Baseline (1), Post-intervention (29) and Follow-up (43) | Baseline level of teachers' use of VAC (counts), group assignment, covariates                  | Linear Regression |
| (8)                                           | Teacher wellbeing                                    | Post-intervention (26) and Follow-up (40)               | Baseline level of teachers' wellbeing, group assignment, covariates                            | Linear Regression |
| <b>Child outcomes</b>                         |                                                      |                                                         |                                                                                                |                   |
| (9)                                           | Prosocial skills                                     | Post-intervention (83)                                  | Baseline level of prosocial skills, group assignment, covariates                               | Linear Regression |
| (10)                                          | Behaviour difficulties                               | Post-intervention (83)                                  | Baseline level of behaviour difficulties, group assignment, covariates                         | Linear Regression |
| (11)                                          | Clinical level behaviour problems                    | Post-intervention (83)                                  | Baseline level of clinical level behaviour problems, group assignment, covariates              | Logit             |
| (12)                                          | Impact of behaviour difficulties on daily life       | Post-intervention (83)                                  | Baseline level of impact of behaviour difficulties on daily life, group assignment, covariates | Logit             |
| (13)                                          | Inhibitory control                                   | Baseline (1) and Post-intervention (83)                 | Baseline level of prosocial skills and behaviour difficulties, group assignment, covariates    | Linear Regression |

Notes: The number in parenthesis indicate the number of missing observations. In the analyses of teacher/classroom outcomes, the covariates include (all at baseline) number of children in the class, number of years teaching in the school, whether the teacher finished high school, whether the teacher has a formal teaching qualification. The covariates in the analyses of child outcomes include child's sex and age.

**Webtable 5** Classroom, teacher, and child characteristics by loss at post-intervention and follow up

|                                                        | Post-Intervention |                     |         | One-Year Follow-Up |                     |         |
|--------------------------------------------------------|-------------------|---------------------|---------|--------------------|---------------------|---------|
|                                                        | Lost <i>n</i> =29 | Found <i>n</i> =200 | P-Value | Lost <i>n</i> =39  | Found <i>n</i> =190 | P-Value |
| Number of years teaching                               | 15.0 (7-21)       | 15 (8-24)           | 0.79    | 15.0 (6-22)        | 15 (9-23)           | 0.38    |
| Number of years teaching at current school             | 7 (1-15)          | 12 (5-20)           | 0.04    | 6 (2-16)           | 12 (5-20)           | 0.04    |
| Number of children in class                            | 16.9 (8.8)        | 16.6 (6.2)          | 0.84    | 15.8 (8.2)         | 16.8 (6.2)          | 0.49    |
| High school completed                                  | 24 (83%)          | 168 (84%)           | 0.87    | 31 (80%)           | 161 (85%)           | 0.45    |
| Trained teacher                                        | 12 (41%)          | 69 (35%)            | 0.47    | 28 (72%)           | 117 (62%)           | 0.07    |
| Currently attending teacher training college           | 5 (17%)           | 23 (12%)            | 0.58    | 8 (21%)            | 19 (10%)            | 0.19    |
| Sex of teacher: female                                 | 28 (97%)          | 196 (98%)           | 0.62    | 39 (100%)          | 185 (98%)           | 0.31    |
| Teachers' use of violence over 1 school day            | 6 (2-12)          | 7 (2-18)            | 0.54    | 9 (2-23)           | 7 (2-16)            | 0.32    |
| Teacher used no violence over 2 school days            | 3 (10%)           | 24 (12%)            | 0.80    | 4 (10%)            | 23 (12%)            | 0.74    |
| Rating of class-wide child aggression                  | 2.2 (1.5-3.5)     | 2.4 (1.6-4.0)       | 0.59    | 2.2 (1.6-3.8)      | 2.4 (1.6-3.9)       | 0.61    |
| Rating of class-wide prosocial behaviour               | 1.8 (1.2-2.3)     | 1.8 (1.4-2.2)       | 0.91    | 2.0 (1.2-2.2)      | 1.8 (1.4-2.2)       | 0.59    |
| Rating of quality of classroom: Emotional support      | 4.4 (0.7)         | 4.2 (0.8)           | 0.28    | 4.21 (0.8)         | 4.3 (0.8)           | 0.75    |
| Rating of quality of classroom: Classroom organisation | 4.9 (0.8)         | 4.8 (0.8)           | 0.68    | 4.8 (0.8)          | 4.8 (0.8)           | 0.74    |
| Rating of quality of classroom: Instructional support  | 1.5 (1.3-1.6)     | 1.4 (1.3-1.5)       | 0.18    | 1.4 (1.3-1.6)      | 1.4 (1.3-1.5)       | 0.56    |
| Teacher well-being                                     | 0.08 (1.26)       | -0.01 (0.96)        | 0.63    | -0.11 (1.1)        | 0.02 (1.0)          | 0.46    |
| <b><i>Child characteristics</i></b>                    | <i>n</i> =82      | <i>n</i> =783       |         |                    |                     |         |
| Child age (in years)                                   | 4.9 (0.4)         | 4.9 (0.3)           | 0.41    | ..                 | ..                  | ..      |
| Child sex: boys                                        | 39 (48%)          | 413 (53%)           | 0.31    | ..                 | ..                  | ..      |
| Child inhibitory control                               | 0.05 (0.97)       | 0.00 (1.00)         | 0.68    | ..                 | ..                  | ..      |
| Behaviour difficulties                                 | 10 (7-14)         | 9 (5-13)            | 0.20    | ..                 | ..                  | ..      |
| Prosocial behaviour                                    | 7 (5-9)           | 7 (5-9)             | 0.31    | ..                 | ..                  | ..      |
| Behaviour difficulties in clinical range               | 18 (22%)          | 134 (17%)           | 0.27    | ..                 | ..                  | ..      |
| Behaviour difficulties impact daily life               | 12 (15%)          | 100 (13%)           | 0.63    | ..                 | ..                  | ..      |

Data are median (interquartile range), mean (SD), or *n* (%).

**Webtable 6** Sensitivity analyses showing effect of intervention on primary and secondary teacher and classroom outcomes at post-intervention and follow-up.<sup>1, 2</sup>

| Measure                                                       | Post-Intervention                        |                                            |                      | One-Year Follow-Up                |                                            |                      |
|---------------------------------------------------------------|------------------------------------------|--------------------------------------------|----------------------|-----------------------------------|--------------------------------------------|----------------------|
|                                                               | Regression Coefficient B (95% CI)        | Effect Size <sup>a</sup> (95% CI)          | P-value              | Regression Coefficient B (95% CI) | Effect Size <sup>a</sup> (95% CI)          | P-value              |
| <b>Primary Outcomes</b>                                       |                                          |                                            |                      |                                   |                                            |                      |
| Violence against children (VAC) by teachers (number of times) | -1.12 (-1.55, -0.70)                     | -67.36% <sup>b</sup><br>(-81.29%, -53.42%) | <0.0001 <sup>c</sup> | -0.77 (-1.18, -0.37)              | -53.71% <sup>b</sup><br>(-72.64%, -34.78%) | <0.0001 <sup>c</sup> |
| Class-wide child aggression <sup>3</sup>                      | 0.04 (-0.09, 0.16)                       | 0.07 (-0.16, 0.29)                         | 0.68 <sup>c</sup>    | -0.07 (-0.21, 0.07)               | -0.14 (-0.41, 0.14)                        | 0.68 <sup>c</sup>    |
| <b>Secondary Outcomes</b>                                     |                                          |                                            |                      |                                   |                                            |                      |
| <b>Classroom and teacher outcomes</b>                         |                                          |                                            |                      |                                   |                                            |                      |
| Class-wide child prosocial behaviour <sup>3</sup>             | 0.16 (0.06, 0.25)                        | 0.46 (0.17, 0.72)                          | 0.002                | 0.07 (-0.03, 0.18)                | 0.20 (-0.08, 0.50)                         | 0.17                 |
| CLASS: emotional support                                      | 0.54 (0.35, 0.74)                        | 0.63 (0.41, 0.87)                          | <0.0001              | 0.37 (0.13, 0.61)                 | 0.47 (0.17, 0.78)                          | 0.002                |
| CLASS: classroom organisation                                 | 0.40 (0.20, 0.61)                        | 0.48 (0.24, 0.73)                          | <0.0001              | 0.32 (0.10, 0.53)                 | 0.41 (0.13, 0.68)                          | 0.004                |
| CLASS: instructional support <sup>3</sup>                     | 0.12 (0.06, 0.19)                        | 0.63 (0.32, 1.00)                          | <0.0001              | 0.05 (-0.01, 0.10)                | 0.28 (-0.06, 0.57)                         | 0.09                 |
| Teacher well-being <sup>4</sup>                               | 0.18 (-0.03, 0.38)                       | 0.18 (-0.19, 0.40)                         | 0.08                 | 0.25 (0.02, 0.48)                 | 0.26 (0.02, 0.50)                          | 0.03                 |
|                                                               | <b>Odds Ratio</b>                        |                                            |                      | <b>Odds Ratio</b>                 |                                            |                      |
| VAC by teachers over 2 school days (binary) <sup>5</sup>      | 0.25 (0.08, 0.82)                        | ..                                         | 0.02                 | 0.61 (0.27, 1.39)                 | ..                                         | 0.24                 |
| <b>Individual child outcomes</b>                              |                                          |                                            |                      |                                   |                                            |                      |
|                                                               | <b>Regression Coefficient B (95% CI)</b> | <b>Effect Size<sup>a</sup> (95% CI)</b>    |                      |                                   |                                            |                      |
| Child inhibitory control <sup>6</sup>                         | 52.57 (10.81, 94.32)                     | 0.17 (0.04, 0.31)                          | 0.01                 | ..                                | ..                                         | ..                   |
| Child behaviour difficulties <sup>7</sup>                     | -0.09 (-0.59, 0.41)                      | -0.04 (-0.27, 0.19)                        | 0.72                 | ..                                | ..                                         | ..                   |
| Child prosocial behaviour <sup>6</sup>                        | -0.34 (-4.57, 3.88)                      | -0.02 (-0.24, 0.20)                        | 0.87                 | ..                                | ..                                         | ..                   |
|                                                               | <b>Odds Ratio</b>                        |                                            |                      |                                   |                                            |                      |
| Clinical range for behaviour difficulties <sup>8</sup>        | 0.46 (0.22, 0.97)                        | ..                                         | 0.04                 | ..                                | ..                                         | ..                   |
| Impact on daily living <sup>9</sup>                           | 0.55 (0.29, 1.06)                        | ..                                         | 0.08                 | ..                                | ..                                         | ..                   |

<sup>1</sup>Analyses adjusting for baseline score, number of children in class, number of years teaching at current school, high school completed, and qualified teacher as fixed effects, and school as a random effect. Estimates are obtained using multiple imputation (20) to adjust for loss to post-intervention or follow-up. <sup>2</sup>Intervention group = 1, control group = 0. <sup>3</sup>Transformed using natural logarithm. <sup>4</sup>Factor score comprising teacher reported depressive symptoms, burn-out, and self-efficacy. <sup>5</sup>0=no violence, 1=violence.

<sup>6</sup>Transformed using Box-Cox of order 2. <sup>7</sup>Transformed using Box-Cox of order 0.5. <sup>8</sup>Above cut off ( $\geq 16$ ) on Strengths and Difficulties Questionnaire (SDQ) behaviour difficulties scale, 0=normal, 1=abnormal. <sup>9</sup>Above cut off ( $\geq 2$ ) on impact supplement of SDQ, 0=normal, 1=abnormal.

<sup>a</sup>The effect size is the regression coefficient divided by standard deviation of control group at post-intervention and follow-up. <sup>b</sup>The percentage change in the number of times that teachers used VAC. <sup>c</sup>P-values for primary outcomes were adjusted for multiple outcomes using Holms step-down procedure.

**Webtable 7** Violence against children by teachers in the early morning, late morning, and early afternoon of one school day at baseline, post-intervention and follow-up by study group

| Time of Day        |                 | Counts of observed VAC by teachers |                      | Effect of intervention VAC by teachers % (95% CI) | P-value |
|--------------------|-----------------|------------------------------------|----------------------|---------------------------------------------------|---------|
|                    |                 | Intervention Median (IQR)          | Control Median (IQR) |                                                   |         |
| Baseline           | Early morning   | 1 (0-5)                            | 1 (0-4)              | ..                                                | ..      |
|                    | Late morning    | 3 (0-8)                            | 3 (0-8)              | ..                                                | ..      |
|                    | Early afternoon | 1 (0-4)                            | 1 (0-5)              | ..                                                | ..      |
| Post-intervention  | Early morning   | 0 (0-4)                            | 2 (0-8)              | -61.51 (-81.05, -41.96)                           | <0.0001 |
|                    | Late morning    | 1 (0-4)                            | 4 (0-14)             | -76.33 (-89.04, -63.62)                           | <0.0001 |
|                    | Early afternoon | 1 (0-4)                            | 4 (0-12)             | -77.28 (-90.17, -64.39)                           | <0.0001 |
| One-year follow-up | Early morning   | 0 (0-1)                            | 1 (0-3)              | -71.61 (-88.52, -54.71)                           | <0.0001 |
|                    | Late morning    | 1 (0-4)                            | 2 (0-8)              | -51.89 (-76.47, -27.31)                           | <0.0001 |
|                    | Early afternoon | 1 (0-3)                            | 2 (0-4)              | -31.92 (-64.02, 0.17)                             | 0.05    |

IQR = interquartile range. Analyses adjusting for baseline score, number of children in class, number of years teaching at current school, high school completed and qualified teacher as fixed effects and school as a random effect. Estimates are obtained using multiple imputation (20) to adjust for loss to post-intervention or follow-up. Intervention group = 1, control group = 0.

The p-values of the joint hypothesis that the effect of intervention in the late morning and early afternoon is the same as the early morning are p=0.30 for post intervention and p=0.14 at one-year follow-up
